# Supplementary material for: Oligo(ethylene glycol)-sidechain microgels prepared in absence of cross-linking agent: Polymerization, characterization and variation of particle deformability
Source: PubMed Central journal article supplement (PMC5515440; doi:10.1371/journal.pone.0181369), 2017-07-18
Supplement: pone.0181369.s001.pdf [file pone.0181369.s001.pdf]

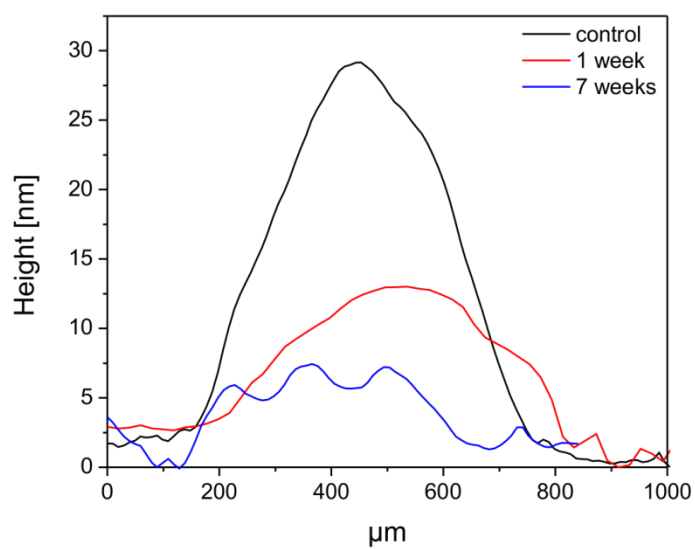

**S1 Fig. Height profiles of non-degraded and partially degraded microgels pOEGMA<sub>80/0</sub>.** After certain incubation periods the particle suspension was centrifuged onto amine-functionalized glass slides. Particles were imaged by AFM in the dried state. The control refers to the height profile of non-degraded intact particles.
