# Supplementary material for: Oligo(ethylene glycol)-sidechain microgels prepared in absence of cross-linking agent: Polymerization, characterization and variation of particle deformability
Source: PubMed Central journal article supplement (PMC5515440; doi:10.1371/journal.pone.0181369), 2017-07-18
Supplement: pone.0181369.s003.pdf [file pone.0181369.s003.pdf]

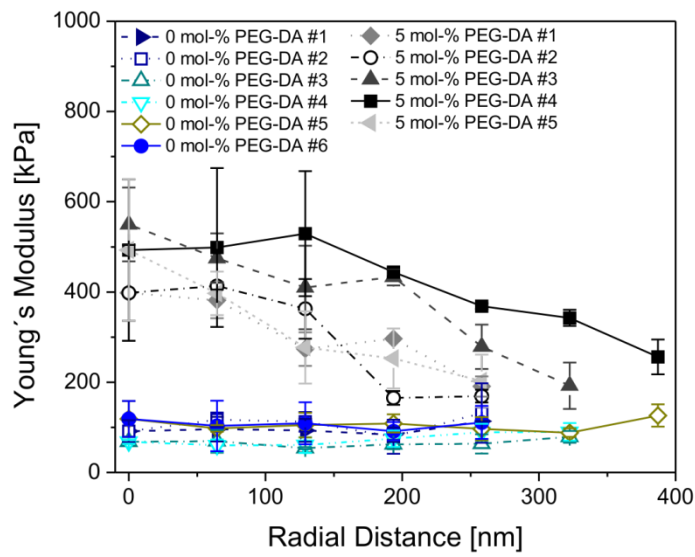

**S3 Fig. Dependence of Young's modulus on the radial position within microgel.** Averaged Young's modulus along the radial position starting at the particle center of PEG-DA cross-linked microgels pOEGMA<sub>80/5</sub> and cross-linker-free particles pOEGMA<sub>80/0</sub>. For each microgel type, several particles have been analyzed.
