# Supplementary material for: Oligo(ethylene glycol)-sidechain microgels prepared in absence of cross-linking agent: Polymerization, characterization and variation of particle deformability
Source: PLOS journal article supplement (doi:10.1371/journal.pone.0181369), 2017-07-18
Supplement: S5 (10.1371/journal.pone.0181369.s005) [file journal.pone.0181369.s005]

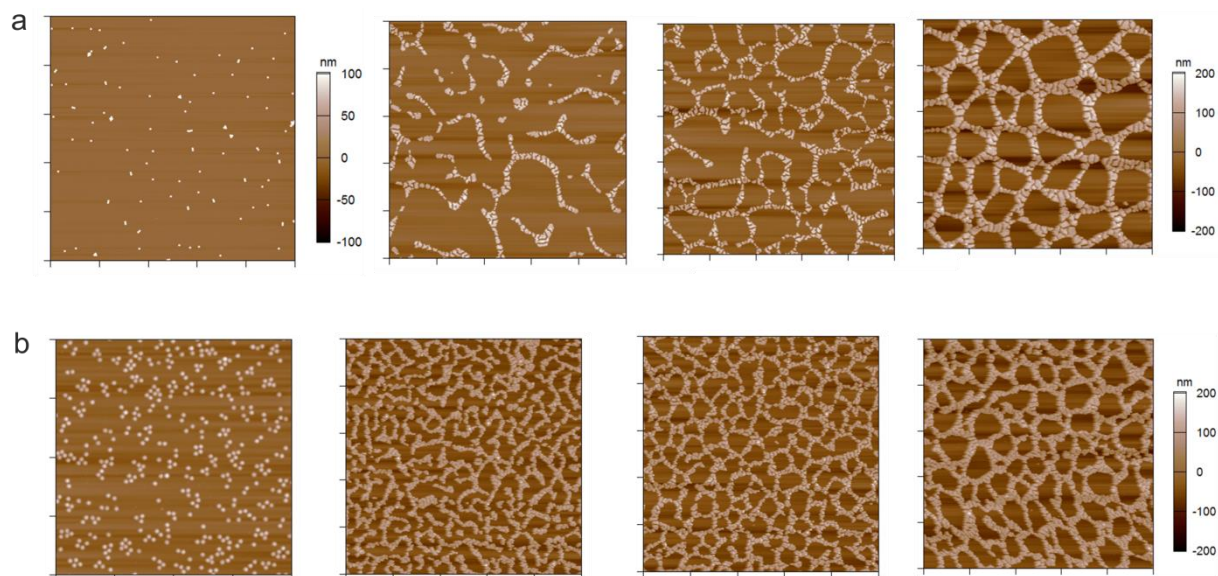

**S5 Fig. Dependence of particle deposition on centrifugation speed and microgel concentration.**

AFM height retraces in air 10 mol-% PEG-DA cross-linked microgels pOEGMA<sub>80/10</sub> deposited at 20 °C and different centrifugation speeds on amine-functionalized glass cover slips. From left to right: 500, 1000, 2000, and 3700 rpm (a). AFM height retraces of 10 mol-% PEG-DA cross-linked particles pOEGMA<sub>80/10</sub> deposited from suspensions differing in the microgel concentration. From left to right: 0.001, 0.01, 0.1, and 0.25 mg/mL (b).
